# Supplementary material
Source: Springer Nature journal article supplement (https://www.springermedizin.de/resource/supplementary/13019_2007_115_MOESM1_ESM.pdf/9637878)

**a**

Preoperative Angina Status

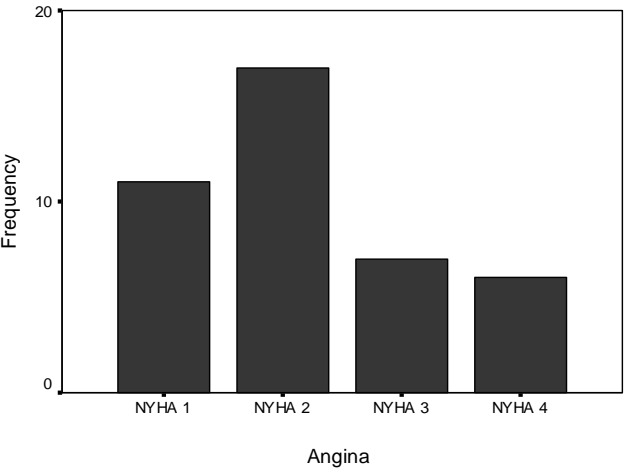

**b**

Preoperative Dyspnoea Status

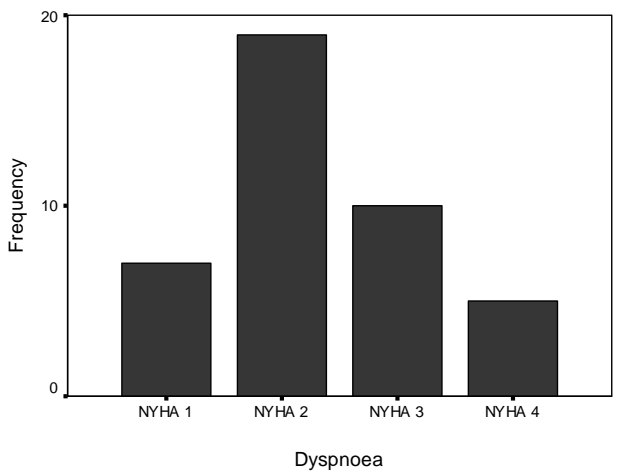

**c**

Angina Status At Follow Up

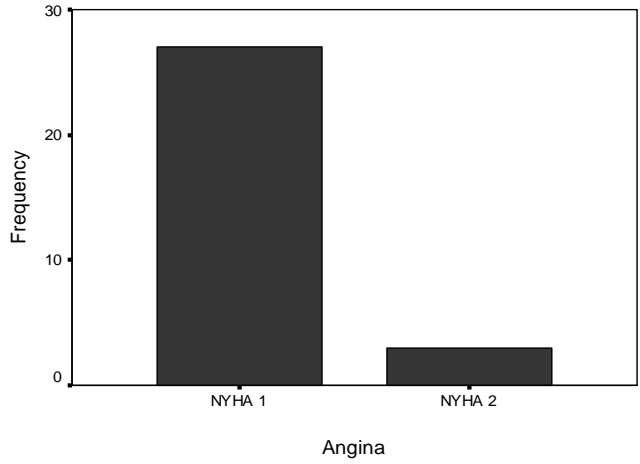

**d**

Dyspnoea Status At Follow Up

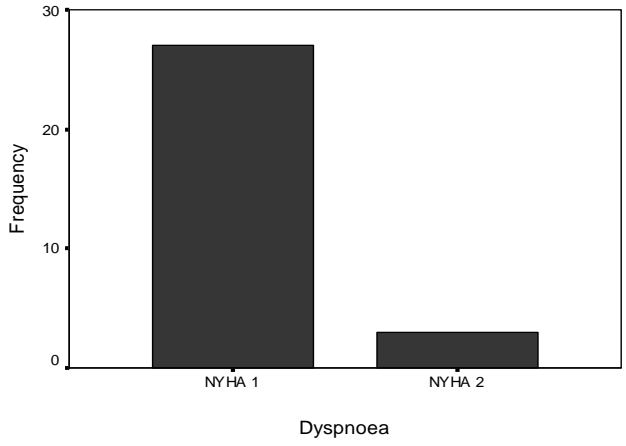

Supplement: MOESM1 [file 9637878]
